# Supplementary material for: Analysis of Pools of Targeted Salmonella Deletion Mutants Identifies Novel Genes Affecting Fitness during Competitive Infection in Mice
Source: PLOS journal article supplement (doi:10.1371/journal.ppat.1000477), 2009-07-02
Supplement: S4 (10.1371/journal.ppat.1000477.s004) [file journal.ppat.1000477.s004]

**Table S2. Specificity and sensitivity of array-based detection of mutants in a pool.**

Data shown are median values from six hybridizations of input samples, including three different preparations, and dye swaps. Inputs were generated from a pool of 1,031 Kan<sup>R</sup> gene deletion mutants grown to stationary phase in LB Kan. Hybridizations included a 27mer competitor oligo (see Materials & Methods, and **Supplementary Figure 2**)

|                                                            | <b>Number of probes<br/>detected (%)*</b> |
|------------------------------------------------------------|-------------------------------------------|
| 3' gene oligos for mutants in pool                         | 905 / 933 (97.0)                          |
| 3' gene oligos for mutants not in pool (negative controls) | 8 / 308 (2.6)                             |
| 5' gene oligos used to make deletions (negative controls)  | 7 / 955 (0.7)                             |

\* normalized signal three-fold above median of negative controls.
